# Supplementary material for: Monitoring Site-Specific Fermentation Outcomes via Oxidation Reduction Potential and UV-Vis Spectroscopy to Characterize “Hidden” Parameters of Pinot Noir Wine Fermentations
Source: MDPI journal article supplement (doi:10.3390/molecules26164748), 2021-08-05
Supplement: s1 [file s1]

# Monitoring Site-Specific Fermentation Outcomes via Oxidation Reduction Potential and UV-Vis Spectroscopy to Characterize “Hidden” Parameters of Pinot Noir Wine Fermentations

Gordon A. Walker <sup>1</sup>, James Nelson <sup>2</sup>, Thomas Halligan <sup>3</sup>, Maisa M. M. Lima <sup>1</sup>, Andre Knoesen <sup>2</sup> and Ron C. Runnebaum <sup>1,3,\*</sup>

<sup>1</sup> Department of Viticulture & Enology, University of California, Davis, CA 95616, USA; gawalker@ucdavis.edu (G.A.W.); mmlima@ucdavis.edu (M.M.M.L.)

<sup>2</sup> Department of Electrical and Computer Engineering, University of California, Davis, CA 95616, USA; jjnel@ucdavis.edu (J.N.); aknoesen@ucdavis.edu (A.K.)

<sup>3</sup> Department of Chemical Engineering, University of California, Davis, CA 95616, USA; twhalligan@ucdavis.edu

\* Correspondence: rcrunnebaum@ucdavis.edu; Tel.: +15-30-752-9078

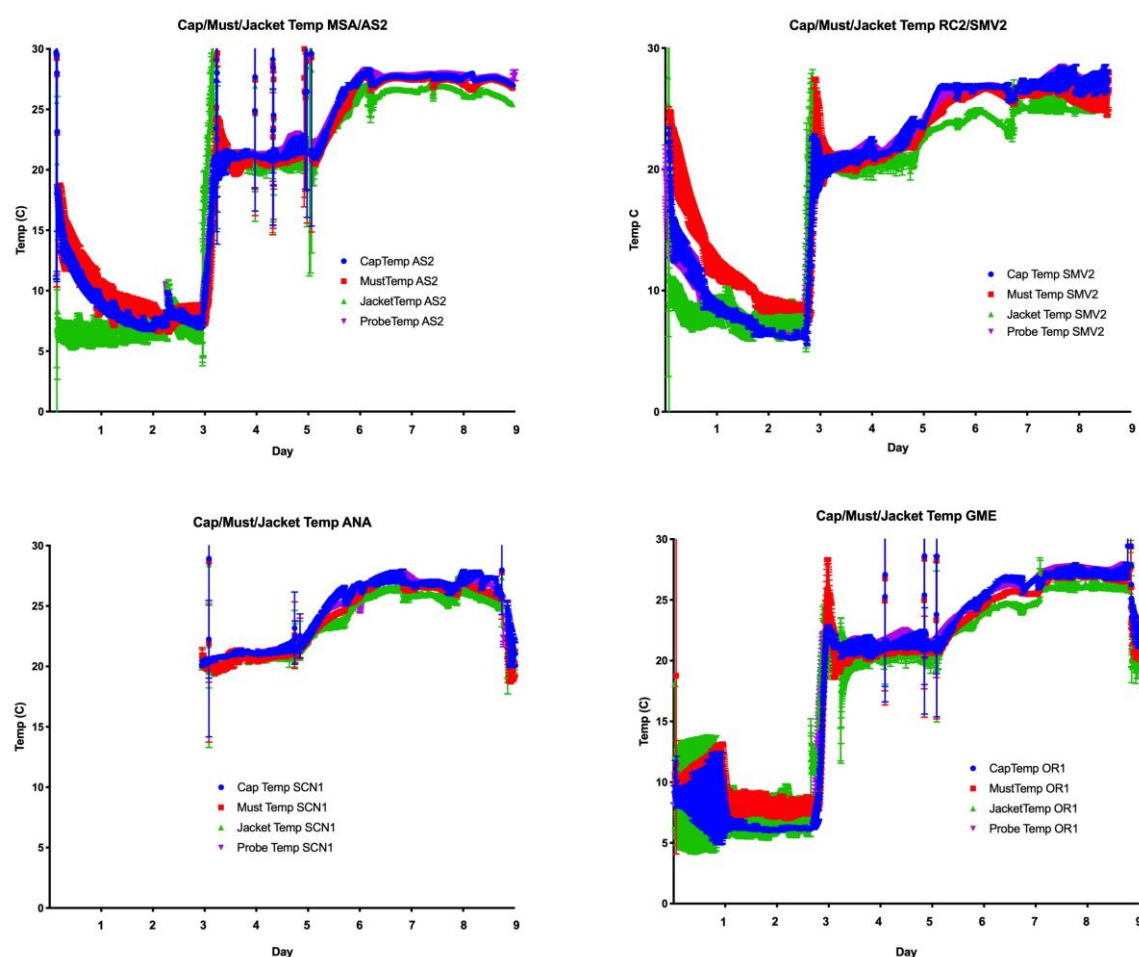

**Figure S1.** Temperature in fermentor. Temperatures for all vineyard sites and replicates are presented. Temperature was recorded with four different probes (Cap, Must, Jacket and ORP Probe) for each condition. The data shows small deviations based on the measurement control for each probe location, but shows similar trends across all conditions and replicates.

**Custom Fabricated Housing  
Knoesen Lab at UC Davis**

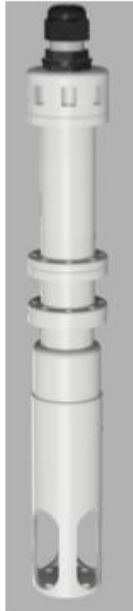

**Hamilton Company Process Sensor  
Easy Ferm Plus ORP 120mm ARC**

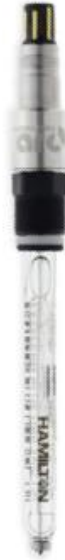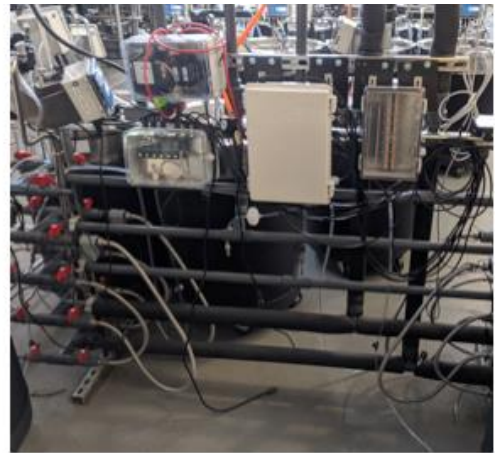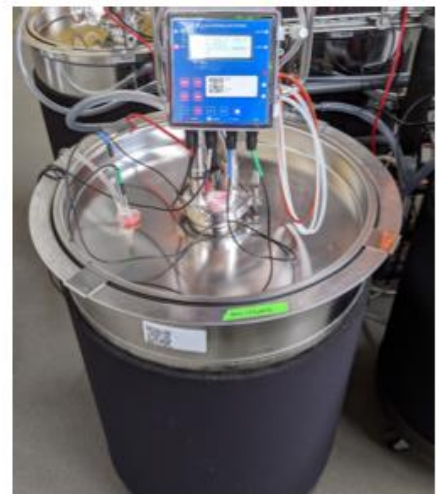

**Figure S2.** Probe/fermentor setup. A diagram of the custom 3D printed housing for the Hamilton ORP probes. Photos of the communication boxes and fermentor set up for ORP probe installation in the UC Davis Research Winery.

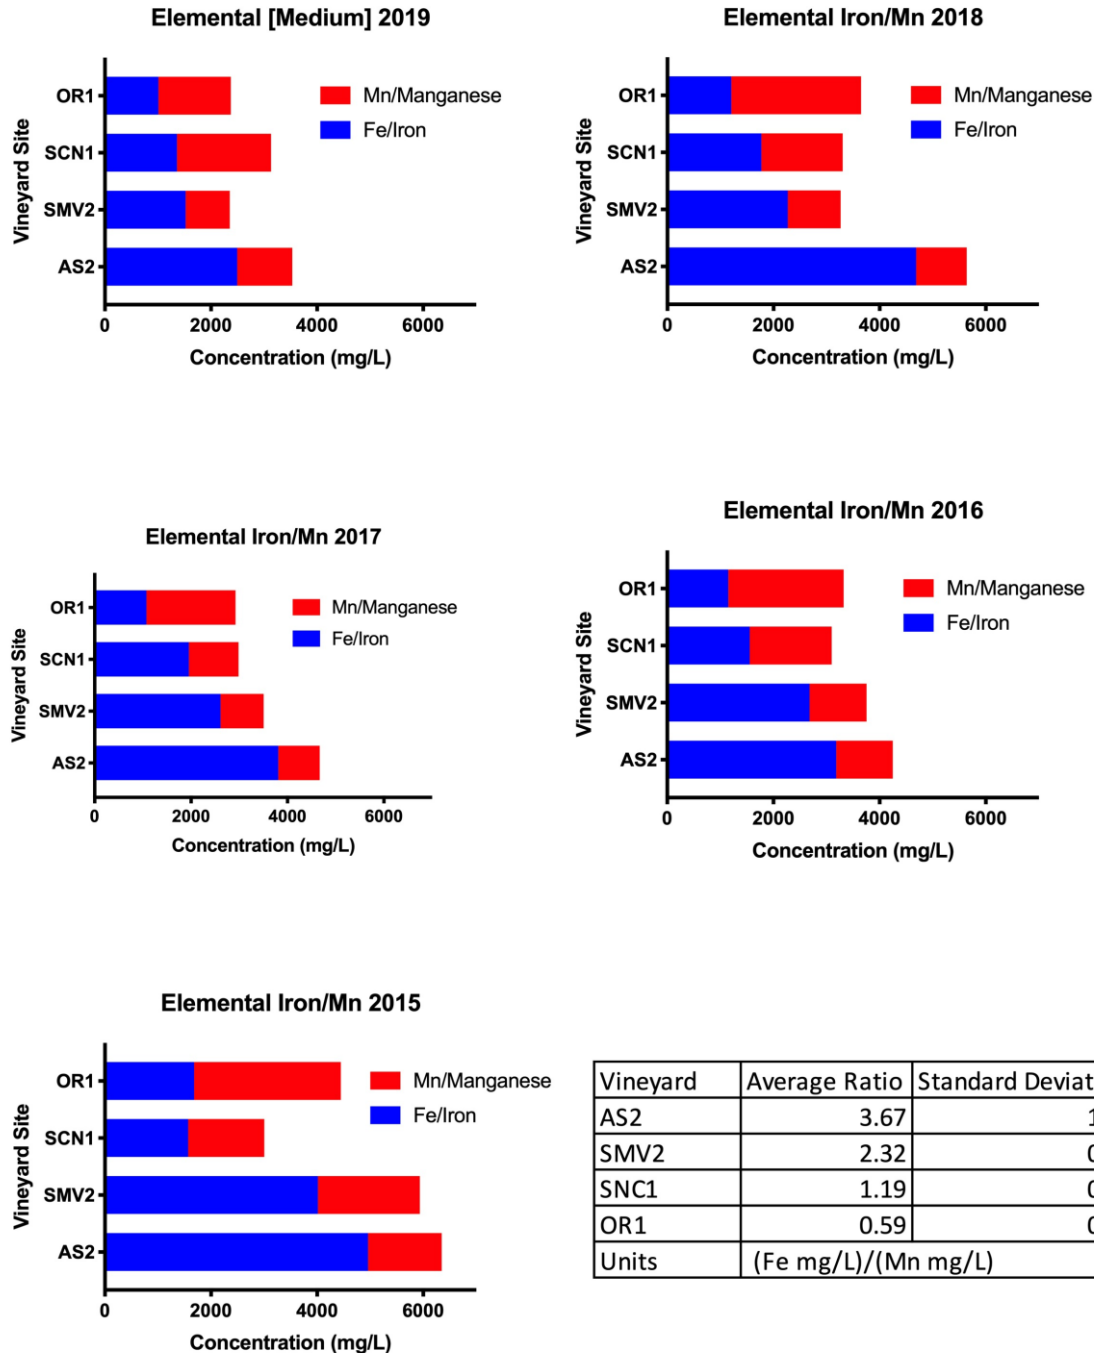

**Figure S3.** Iron/manganese ratio by vintage. Iron to manganese ratios quantified over 5 vintages. There is variation within each vintage, but the ratio of Fe:Mn is fairly consistent, especially for the OR1 vineyard.

**Table S1.** Fermentation profiles of the musts from the four different vineyard sites at various sampling time points from 16–112 h. Data reported are average density measurements (Brix) of four replicate fermentations for each site.

|      | 16 h   | 26 h   | 40 h   | 50 h   | 64 h  | 74 h   | 88 h   | 98 h   | 112 h  |
|------|--------|--------|--------|--------|-------|--------|--------|--------|--------|
| Site | Brix   |        |        |        |       |        |        |        |        |
| OR1  | 22.7 c | 20.6 b | 15.3 a | 13.5 a | 8.0 b | 6.7 a  | 3.4 a  | 2.4 a  | −0.2 a |
| SNC1 | 23.8 a | 21.9 a | 16.0 a | 14.0 a | 9.2 a | 7.2 a  | 3.3 a  | 1.6 b  | −0.5 a |
| SMV2 | 23.9 a | 21.8 a | 14.8 a | 11.7 b | 6.1 c | 3.9 b  | 0.6 b  | −0.5 c | −1.0 b |
| AS2  | 23.2 b | 20.3 b | 11.7 b | 9.5 c  | 2.5 d | −0.1 c | −1.1 c | −1.3 d | −1.3 b |
